# Supplementary material for: Motives to Report Adverse Drug Reactions to the National Agency: A Survey Study among Healthcare Professionals and Patients in Croatia, The Netherlands, and the UK
Source: PubMed Central journal article supplement — Drug Saf. 2021 Aug 8;44(10):1073–83. doi: 10.1007/s40264-021-01098-4 (PMC8473351; doi:10.1007/s40264-021-01098-4), 2021-08-08
Supplement: 40264_2021_1098_MOESM1_ESM.pdf [file 40264_2021_1098_MOESM1_ESM.pdf]

## *Drug Safety*

### **Motives to report adverse drug reactions to the national agency: A survey study among healthcare professionals and patients in Croatia, the Netherlands, and the UK**

Sieta T. de Vries, PhD<sup>1,2</sup>; Petra Denig, PhD<sup>1</sup>; Adriana Andrić, MD<sup>3,4</sup>; Marina Dimov Di Giusti, MD<sup>3,4</sup>; Alicia Ptaszynska-Neophytou<sup>5</sup>; Linda Härmark, PhD<sup>6</sup>; Peter G.M. Mol, PhD<sup>1,2,7</sup>; on behalf of IMI Web-RADR work package 3b consortium and SCOPE Joint Action work package 4.

<sup>1</sup> University of Groningen, University Medical Center Groningen, Department of Clinical Pharmacy and Pharmacology, The Netherlands

<sup>2</sup> Web-RADR work package 3B

<sup>3</sup> Agency for Medicinal Products and Medical Devices of Croatia (HALMED), Croatia

<sup>4</sup> SCOPE Joint Action work package 4

<sup>5</sup> Medicines and Healthcare products Regulatory Agency, London, UK

<sup>6</sup> Netherlands Pharmacovigilance Centre Lareb, 's-Hertogenbosch, The Netherlands

<sup>7</sup> Dutch Medicines Evaluation Board, Utrecht, the Netherlands

#### **Corresponding author:**

P.G.M. Mol, PhD

E-mail: p.g.m.mol@umcg.nl

Phone: +31 (0)50-3617861

Fax +31 (0)50-3617889

**Electronic Supplementary Material Table 1.** Characteristics of the included healthcare professionals

|                                                                      | Total      |
|----------------------------------------------------------------------|------------|
| <b><i>n</i> (%)</b>                                                  | 296        |
| <b>Median age, years (range)<sup>a</sup></b>                         | 37 (20-71) |
| <b>Sex<sup>b</sup></b>                                               |            |
| Male                                                                 | 93 (32)    |
| Female                                                               | 201 (68)   |
| Other/prefer not to say                                              | 1 (0)      |
| <b>Profession</b>                                                    |            |
| Primary care physician                                               | 35 (12)    |
| Community/primary care pharmacist                                    | 101 (34)   |
| Hospital pharmacist                                                  | 42 (14)    |
| Nurse practitioner                                                   | 24 (8)     |
| Secondary care/hospital physician/medical specialist                 | 79 (27)    |
| Support staff                                                        | 15 (5)     |
| <b>Accreditation, years</b>                                          |            |
| <5 years                                                             | 78 (26)    |
| 5 – 20 years                                                         | 137 (46)   |
| >20 years                                                            | 81 (27)    |
| <b>Ever reported an ADR to the national pharmacovigilance center</b> |            |
| Yes                                                                  | 239 (81)   |
| No                                                                   | 44 (15)    |
| Don't know/don't remember                                            | 13 (4)     |

Data are expressed as *n* (%) unless otherwise specified. <sup>a</sup> 2 Missing; <sup>b</sup> 1 Missing; ADR = adverse drug reaction
