# Supplementary material for: Motives to Report Adverse Drug Reactions to the National Agency: A Survey Study among Healthcare Professionals and Patients in Croatia, The Netherlands, and the UK
Source: PubMed Central journal article supplement — Drug Saf. 2021 Aug 8;44(10):1073–83. doi: 10.1007/s40264-021-01098-4 (PMC8473351; doi:10.1007/s40264-021-01098-4), 2021-08-08
Supplement: 40264_2021_1098_MOESM2_ESM.pdf [file 40264_2021_1098_MOESM2_ESM.pdf]

## *Drug Safety*

### **Motives to report adverse drug reactions to the national agency: A survey study among healthcare professionals and patients in Croatia, the Netherlands, and the UK**

Sieta T. de Vries, PhD<sup>1,2</sup>; Petra Denig, PhD<sup>1</sup>; Adriana Andrić, MD<sup>3,4</sup>; Marina Dimov Di Giusti, MD<sup>3,4</sup>; Alicia Ptaszynska-Neophytou<sup>5</sup>; Linda Härmark, PhD<sup>6</sup>; Peter G.M. Mol, PhD<sup>1,2,7</sup>; on behalf of IMI Web-RADR work package 3b consortium and SCOPE Joint Action work package 4.

<sup>1</sup> University of Groningen, University Medical Center Groningen, Department of Clinical Pharmacy and Pharmacology, The Netherlands

<sup>2</sup> Web-RADR work package 3B

<sup>3</sup> Agency for Medicinal Products and Medical Devices of Croatia (HALMED), Croatia

<sup>4</sup> SCOPE Joint Action work package 4

<sup>5</sup> Medicines and Healthcare products Regulatory Agency, London, UK

<sup>6</sup> Netherlands Pharmacovigilance Centre Lareb, 's-Hertogenbosch, The Netherlands

<sup>7</sup> Dutch Medicines Evaluation Board, Utrecht, the Netherlands

#### **Corresponding author:**

P.G.M. Mol, PhD

E-mail: p.g.m.mol@umcg.nl

Phone: +31 (0)50-3617861

Fax +31 (0)50-3617889

**Electronic Supplementary Material Table 2.** Number (%) of healthcare professionals selecting the different answer options for motives (not) to report adverse drug reactions and P-values for tests of differences across the countries

|                                                                                                    | Total    | Croatia<br>(HR) | Netherlands<br>(NL) | UK      | P-value                                                                                          |
|----------------------------------------------------------------------------------------------------|----------|-----------------|---------------------|---------|--------------------------------------------------------------------------------------------------|
| <b>A. What would motivate you to report an adverse drug reaction?<sup>1</sup></b>                  |          |                 |                     |         |                                                                                                  |
| If you receive an award for the most informative report of the year                                | 13 (4)   | 6 (3)           | 0 (0)               | 7 (11)  | 0.006 (V=0.18)<br>HR-NL: 0.165<br><b>NL-UK: 0.010</b><br>HR-UK: 0.017                            |
| If you receive financial compensation                                                              | 25 (9)   | 13 (7)          | 3 (5)               | 9 (15)  | 0.137                                                                                            |
| If there is a legal obligation to report adverse drug reactions                                    | 150 (51) | 114 (65)        | 13 (24)             | 23 (38) | <0.001 (V=0.34)<br><b>HR-NL: &lt;0.001</b><br>NL-UK: 0.102<br><b>HR-UK: &lt;0.001</b>            |
| If you strongly suspect there is an association of causality between the medicine and the reaction | 261 (89) | 160 (91)        | 47 (85)             | 54 (89) | 0.503                                                                                            |
| If it concerns a reaction to a new, recently marketed medicine                                     | 226 (77) | 127 (72)        | 44 (80)             | 55 (90) | 0.013 (V=0.17)<br>HR-NL: 0.247<br>NL-UK: 0.122<br><b>HR-UK: 0.004</b>                            |
| If the medicine causing the adverse drug reaction has a black triangle in the package leaflet      | 96 (33)  | 47 (27)         | 2 (4)               | 47 (77) | <0.001 (V=0.52)<br><b>HR-NL: &lt;0.001</b><br><b>NL-UK: &lt;0.001</b><br><b>HR-UK: &lt;0.001</b> |
| If the medicine is taken for compassionate use                                                     | 38 (13)  | 19 (11)         | 8 (15)              | 11 (18) | 0.327                                                                                            |
| If the medicine was taken as offlabel use                                                          | 119 (41) | 67 (38)         | 22 (40)             | 30 (49) | 0.312                                                                                            |
| If you prescribed the medicine yourself                                                            | 72 (25)  | 46 (26)         | 6 (11)              | 20 (33) | 0.019 (V=0.16)<br>HR-NL: 0.018<br><b>NL-UK: 0.005</b><br>HR-UK: 0.318                            |
| If the adverse drug reaction is severe/serious                                                     | 251 (86) | 148 (84)        | 48 (87)             | 55 (90) | 0.477                                                                                            |
| If the adverse drug reaction influences a patient's daily activities                               | 186 (64) | 112 (64)        | 28 (51)             | 46 (75) | 0.023 (V=0.16)<br>HR-NL: 0.092<br><b>NL-UK: 0.006</b><br>HR-UK: 0.093                            |
| If the adverse drug reaction lasts for a relatively long period (e.g. more than two/three days)    | 135 (46) | 82 (47)         | 21 (38)             | 32 (52) | 0.302                                                                                            |
| If the report is fully anonymous with respect to the patient it concerns                           | 101 (35) | 66 (38)         | 9 (16)              | 26 (43) | 0.005 (V=0.19)<br><b>HR-NL: 0.003</b><br><b>NL-UK: 0.002</b><br>HR-UK: 0.479                     |
| If the report is fully anonymous with respect to you as a reporter                                 | 35 (12)  | 24 (14)         | 1 (2)               | 10 (16) | 0.031 (V=0.15)<br><b>HR-NL: 0.014</b>                                                            |

|                                                                             |          |         |         |         | <b>NL-UK: 0.007</b><br>HR-UK: 0.597                                        |
|-----------------------------------------------------------------------------|----------|---------|---------|---------|----------------------------------------------------------------------------|
| <b>B. What are your reasons for not reporting an ADR?<sup>2</sup></b>       |          |         |         |         |                                                                            |
| Lack of time                                                                | 155 (64) | 94 (68) | 32 (62) | 29 (54) | 0.166                                                                      |
| Uncertainty about the drug causing the adverse drug reaction                | 108 (44) | 50 (36) | 29 (56) | 29 (54) | 0.015 (V=0.18)<br><b>HR-NL: 0.015</b><br>NL-UK: 0.831<br>HR-UK: 0.027      |
| Difficulty in accessing reporting forms                                     | 67 (27)  | 35 (25) | 16 (31) | 16 (30) | 0.698                                                                      |
| Lack of understanding of the purpose of spontaneous reporting systems       | 14 (6)   | 6 (4)   | 3 (6)   | 5 (9)   | 0.421                                                                      |
| If the adverse drug reaction has been resolved                              | 30 (12)  | 14 (10) | 5 (10)  | 11 (20) | 0.122                                                                      |
| If it concerns a well-known adverse drug reaction                           | 154 (63) | 73 (53) | 44 (85) | 37 (69) | <0.001 (V=0.26)<br><b>HR-NL: &lt;0.001</b><br>NL-UK: 0.051<br>HR-UK: 0.049 |
| Serious reactions are already known at the time a drug is marketed          | 28 (11)  | 12 (9)  | 5 (10)  | 11 (20) | 0.066                                                                      |
| One case reported by an individual will not contribute to medical knowledge | 2 (1)    | 1 (1)   | 1 (2)   | 0 (0)   | 0.538                                                                      |
| If I think the case does not contribute to medical knowledge                | 25 (10)  | 11 (8)  | 10 (19) | 4 (7)   | 0.055                                                                      |

---

<sup>1</sup> 3 missing; 1 'Nothing would motivate me'; <sup>2</sup> 48 'None'
