# Supplementary material for: Motives to Report Adverse Drug Reactions to the National Agency: A Survey Study among Healthcare Professionals and Patients in Croatia, The Netherlands, and the UK
Source: PubMed Central journal article supplement — Drug Saf. 2021 Aug 8;44(10):1073–83. doi: 10.1007/s40264-021-01098-4 (PMC8473351; doi:10.1007/s40264-021-01098-4), 2021-08-08
Supplement: 40264_2021_1098_MOESM3_ESM.pdf [file 40264_2021_1098_MOESM3_ESM.pdf]

## *Drug Safety*

### **Motives to report adverse drug reactions to the national agency: A survey study among healthcare professionals and patients in Croatia, the Netherlands, and the UK**

Sieta T. de Vries, PhD<sup>1,2</sup>; Petra Denig, PhD<sup>1</sup>; Adriana Andrić, MD<sup>3,4</sup>; Marina Dimov Di Giusti, MD<sup>3,4</sup>; Alicia Ptaszynska-Neophytou<sup>5</sup>; Linda Härmark, PhD<sup>6</sup>; Peter G.M. Mol, PhD<sup>1,2,7</sup>; on behalf of IMI Web-RADR work package 3b consortium and SCOPE Joint Action work package 4.

<sup>1</sup> University of Groningen, University Medical Center Groningen, Department of Clinical Pharmacy and Pharmacology, The Netherlands

<sup>2</sup> Web-RADR work package 3B

<sup>3</sup> Agency for Medicinal Products and Medical Devices of Croatia (HALMED), Croatia

<sup>4</sup> SCOPE Joint Action work package 4

<sup>5</sup> Medicines and Healthcare products Regulatory Agency, London, UK

<sup>6</sup> Netherlands Pharmacovigilance Centre Lareb, 's-Hertogenbosch, The Netherlands

<sup>7</sup> Dutch Medicines Evaluation Board, Utrecht, the Netherlands

#### **Corresponding author:**

P.G.M. Mol, PhD

E-mail: p.g.m.mol@umcg.nl

Phone: +31 (0)50-3617861

Fax +31 (0)50-3617889

**Electronic Supplementary Material Table 3.** Characteristics of the included patients

|                                                                                                             | Total      |
|-------------------------------------------------------------------------------------------------------------|------------|
| <b><i>n</i> (%)</b>                                                                                         | 423        |
| <b>Median age, years (range)<sup>a</sup></b>                                                                | 51 (14-89) |
| <b>Sex (%)</b>                                                                                              |            |
| Male                                                                                                        | 159 (38)   |
| Female                                                                                                      | 262 (62)   |
| Other/prefer not to say                                                                                     | 2 (0)      |
| <b>Education</b>                                                                                            |            |
| Primary education                                                                                           | 3 (1)      |
| Lower secondary education                                                                                   | 39 (9)     |
| Upper secondary education                                                                                   | 69 (16)    |
| Post-secondary but non-tertiary education                                                                   | 43 (10)    |
| First stage of tertiary education                                                                           | 141 (33)   |
| Second stage of tertiary education                                                                          | 128 (30)   |
| <b>Number of prescribed medicines</b>                                                                       |            |
| 0                                                                                                           | 80 (19)    |
| 1                                                                                                           | 54 (13)    |
| 2                                                                                                           | 52 (12)    |
| 3                                                                                                           | 33 (8)     |
| 4                                                                                                           | 43 (10)    |
| 5 or more                                                                                                   | 161 (38)   |
| <b>Experienced a side-effect</b>                                                                            |            |
| Yes                                                                                                         | 341 (81)   |
| No                                                                                                          | 61 (14)    |
| Don't know/don't remember                                                                                   | 21 (5)     |
| <b>Aware of the possibility to report experienced side-effects to the national pharmacovigilance centre</b> |            |
| Yes                                                                                                         | 228 (54)   |
| No                                                                                                          | 107 (25)   |
| I have never heard of the national pharmacovigilance centre                                                 | 88 (21)    |

Data are expressed as *n* (%) unless otherwise specified. <sup>a</sup> 1 Missing; ADR = adverse drug reaction
