# Supplementary material for: Motives to Report Adverse Drug Reactions to the National Agency: A Survey Study among Healthcare Professionals and Patients in Croatia, The Netherlands, and the UK
Source: PubMed Central journal article supplement — Drug Saf. 2021 Aug 8;44(10):1073–83. doi: 10.1007/s40264-021-01098-4 (PMC8473351; doi:10.1007/s40264-021-01098-4), 2021-08-08
Supplement: 40264_2021_1098_MOESM4_ESM.pdf [file 40264_2021_1098_MOESM4_ESM.pdf]

## *Drug Safety*

### **Motives to report adverse drug reactions to the national agency: A survey study among healthcare professionals and patients in Croatia, the Netherlands, and the UK**

Sieta T. de Vries, PhD<sup>1,2</sup>; Petra Denig, PhD<sup>1</sup>; Adriana Andrić, MD<sup>3,4</sup>; Marina Dimov Di Giusti, MD<sup>3,4</sup>; Alicia Ptaszynska-Neophytou<sup>5</sup>; Linda Härmark, PhD<sup>6</sup>; Peter G.M. Mol, PhD<sup>1,2,7</sup>; on behalf of IMI Web-RADR work package 3b consortium and SCOPE Joint Action work package 4.

<sup>1</sup> University of Groningen, University Medical Center Groningen, Department of Clinical Pharmacy and Pharmacology, The Netherlands

<sup>2</sup> Web-RADR work package 3B

<sup>3</sup> Agency for Medicinal Products and Medical Devices of Croatia (HALMED), Croatia

<sup>4</sup> SCOPE Joint Action work package 4

<sup>5</sup> Medicines and Healthcare products Regulatory Agency, London, UK

<sup>6</sup> Netherlands Pharmacovigilance Centre Lareb, 's-Hertogenbosch, The Netherlands

<sup>7</sup> Dutch Medicines Evaluation Board, Utrecht, the Netherlands

#### **Corresponding author:**

P.G.M. Mol, PhD

E-mail: p.g.m.mol@umcg.nl

Phone: +31 (0)50-3617861

Fax +31 (0)50-3617889

**Electronic Supplementary Material Table 4.** Number (%) of patients who agreed or totally agreed per statement starting with ‘I would report a side-effect to the national agency...’

|                                                                                                   | Overall  |
|---------------------------------------------------------------------------------------------------|----------|
| ... if the side-effect was severe                                                                 | 404 (96) |
| ... if the side-effect influences my daily activities                                             | 385 (91) |
| ... if the side-effect is not mentioned in the PIL                                                | 370 (87) |
| ... if I am worried about my own situation                                                        | 381 (90) |
| ... if the side-effect has not yet been resolved                                                  | 365 (86) |
| ... if I am completely sure that the symptom is a side-effect of my medicine                      | 363 (86) |
| ... if the side-effect lasts for a relatively long period (for instance more than two/three days) | 354 (84) |
| ... if the side-effect is caused by a medicine prescribed by a HCP                                | 360 (85) |
| ... if I asked a HCP but he/she refused                                                           | 361 (85) |
| ... if completing the report takes only a few minutes of my time                                  | 312 (74) |
| ... if the side-effect is caused by a medicine that I use without a prescription from a HCP       | 243 (57) |
| ... if I have purchased the medicine on the internet, not in the pharmacy                         | 217 (51) |
| ... if the report will not be linked to my medical notes to which HCPs have access                | 223 (53) |

HCP = healthcare professional; PIL = Patient information leaflet
