# Supplementary material for: Motives to Report Adverse Drug Reactions to the National Agency: A Survey Study among Healthcare Professionals and Patients in Croatia, The Netherlands, and the UK
Source: PubMed Central journal article supplement — Drug Saf. 2021 Aug 8;44(10):1073–83. doi: 10.1007/s40264-021-01098-4 (PMC8473351; doi:10.1007/s40264-021-01098-4), 2021-08-08
Supplement: 40264_2021_1098_MOESM5_ESM.pdf [file 40264_2021_1098_MOESM5_ESM.pdf]

## *Drug Safety*

### **Motives to report adverse drug reactions to the national agency: A survey study among healthcare professionals and patients in Croatia, the Netherlands, and the UK**

Sieta T. de Vries, PhD<sup>1,2</sup>; Petra Denig, PhD<sup>1</sup>; Adriana Andrić, MD<sup>3,4</sup>; Marina Dimov Di Giusti, MD<sup>3,4</sup>; Alicia Ptaszynska-Neophytou<sup>5</sup>; Linda Härmark, PhD<sup>6</sup>; Peter G.M. Mol, PhD<sup>1,2,7</sup>; on behalf of IMI Web-RADR work package 3b consortium and SCOPE Joint Action work package 4.

<sup>1</sup> University of Groningen, University Medical Center Groningen, Department of Clinical Pharmacy and Pharmacology, The Netherlands

<sup>2</sup> Web-RADR work package 3B

<sup>3</sup> Agency for Medicinal Products and Medical Devices of Croatia (HALMED), Croatia

<sup>4</sup> SCOPE Joint Action work package 4

<sup>5</sup> Medicines and Healthcare products Regulatory Agency, London, UK

<sup>6</sup> Netherlands Pharmacovigilance Centre Lareb, 's-Hertogenbosch, The Netherlands

<sup>7</sup> Dutch Medicines Evaluation Board, Utrecht, the Netherlands

#### **Corresponding author:**

P.G.M. Mol, PhD

E-mail: p.g.m.mol@umcg.nl

Phone: +31 (0)50-3617861

Fax +31 (0)50-3617889

**Electronic Supplementary Material Table 5.** Number (%) of patients selecting the different answer options for motives (not) to report adverse drug reactions and P-values for tests of differences across the countries

|                                                                                                                         | Total    | Croatia<br>(HR) | Netherlands<br>(NL) | UK      | P-value                                                                                     |
|-------------------------------------------------------------------------------------------------------------------------|----------|-----------------|---------------------|---------|---------------------------------------------------------------------------------------------|
| <b>A. In your opinion, what are the benefits of reporting side-effects directly to the national agency?<sup>1</sup></b> |          |                 |                     |         |                                                                                             |
| I can offer my perspective by describing my own experience                                                              | 213 (51) | 68 (50)         | 89 (49)             | 56 (57) | 0.487                                                                                       |
| I can contribute to the safety of medicines                                                                             | 353 (85) | 115 (85)        | 144 (80)            | 94 (95) | 0.004 (V=0.16)<br><b>HR – NL: 0.297</b><br><b>NL – UK: 0.001</b><br><b>HR – UK: 0.012</b>   |
| I can share my experience for the benefit of others                                                                     | 329 (79) | 103 (76)        | 137 (76)            | 89 (90) | 0.011 (V=0.15)<br><b>HR – NL: 0.938</b><br><b>NL – UK: 0.005</b><br><b>HR – UK: 0.006</b>   |
| I can report independently of healthcare professionals                                                                  | 257 (62) | 91 (67)         | 107 (59)            | 59 (60) | 0.344                                                                                       |
| I can report side effects that I'm embarrassed to discuss with healthcare professionals                                 | 98 (24)  | 44 (32)         | 19 (11)             | 35 (35) | <0.001 (V=0.27)<br><b>HR – NL: &lt;0.001</b><br><b>NL – UK: &lt;0.001</b><br>HR – UK: 0.631 |
| <b>B. What are in your opinion the drawbacks of reporting side-effects directly to the national agency?<sup>2</sup></b> |          |                 |                     |         |                                                                                             |
| I do not know how to report                                                                                             | 146 (47) | 52 (48)         | 55 (43)             | 39 (52) | 0.439                                                                                       |
| I do not know what happens with my report after I report                                                                | 197 (63) | 76 (70)         | 75 (59)             | 46 (61) | 0.160                                                                                       |
| Reporting is too complicated or time-consuming                                                                          | 73 (23)  | 27 (25)         | 16 (13)             | 30 (40) | <0.001 (V=0.25)<br><b>HR – NL: 0.013</b><br><b>NL – UK: &lt;0.001</b><br>HR – UK: 0.031     |
| There is no direct benefit for me personally from reporting                                                             | 52 (17)  | 23 (21)         | 18 (14)             | 11 (15) | 0.286                                                                                       |
| I do not want to share my personal data                                                                                 | 38 (12)  | 17 (16)         | 15 (12)             | 6 (8)   | 0.283                                                                                       |
| I do not want to be contacted after I report                                                                            | 15 (5)   | 6 (6)           | 6 (5)               | 3 (4)   | 0.886                                                                                       |
| <sup>1</sup> 1 missing; 7 'none'; <sup>2</sup> 112 'none'                                                               |          |                 |                     |         |                                                                                             |
